# Supplementary material for: Genome-Wide Association Study for Body Conformation Traits and Fitness in Czech Holsteins
Source: MDPI journal article supplement (doi:10.3390/ani12243522), 2022-12-13
Supplement: s1 [file s1]

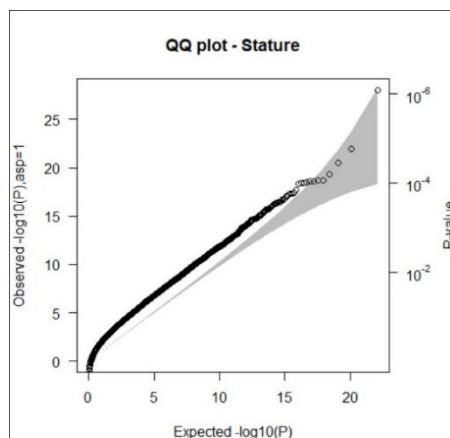

$\lambda = 1.81$

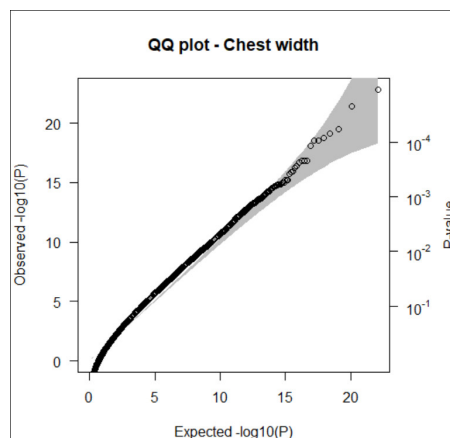

$\lambda = -0.64$

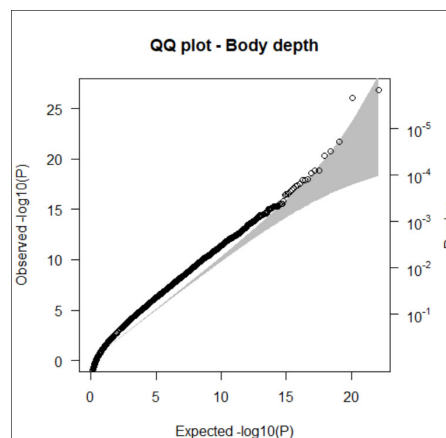

$\lambda = 0.59$

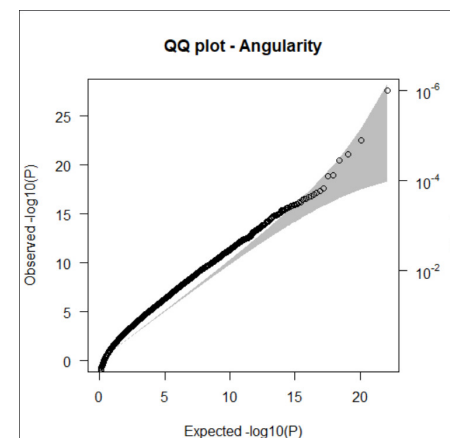

$\lambda = 0.82$

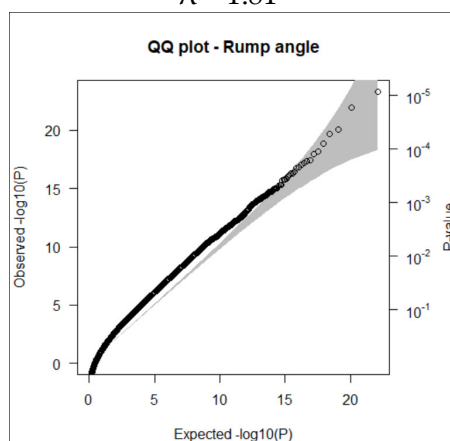

$\lambda = 0.37$

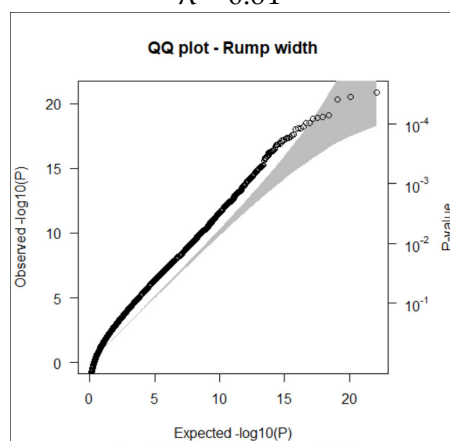

$\lambda = 0.82$

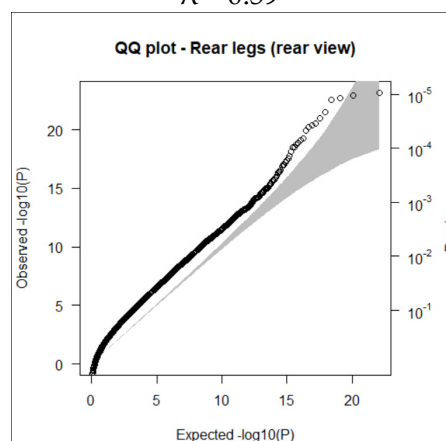

$\lambda = 1.41$

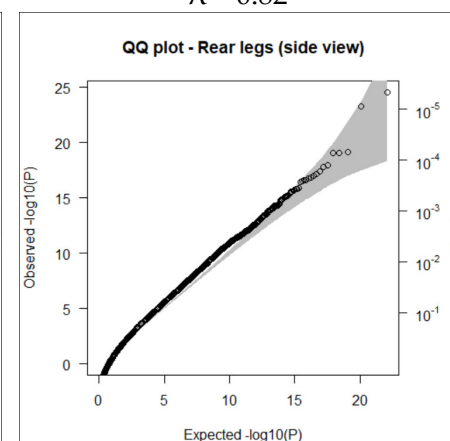

$\lambda = -0.81$

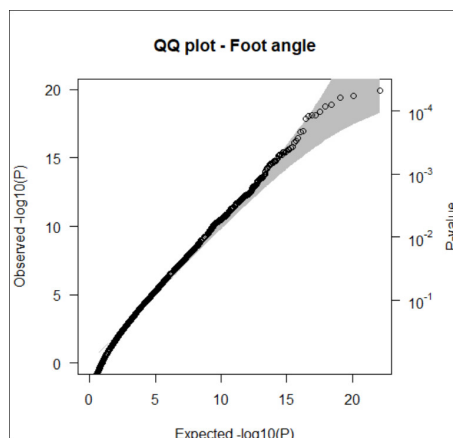

$\lambda = -1.47$

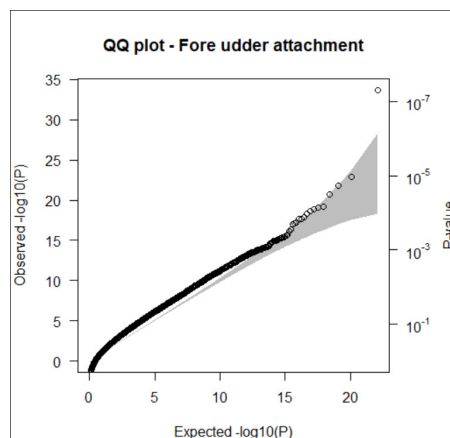

$\lambda = 0.38$

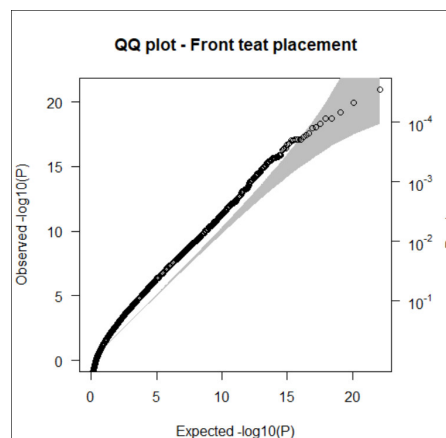

$\lambda = 0.66$

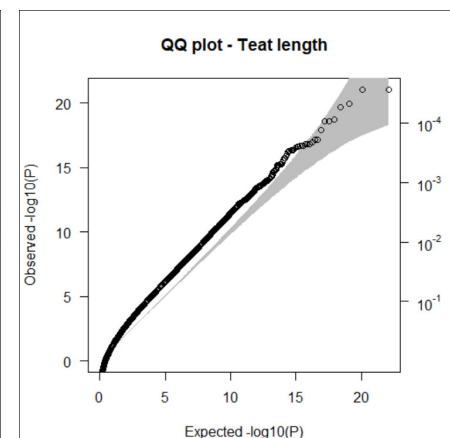

$\lambda = 0.45$

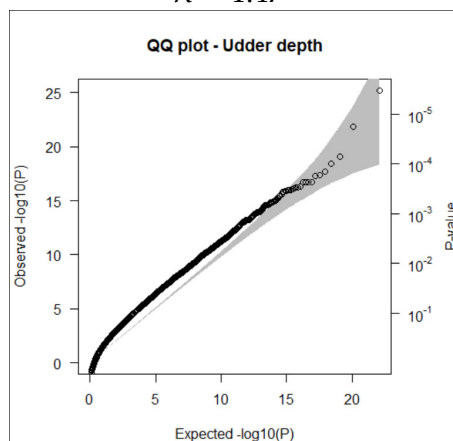

$\lambda = 0.97$

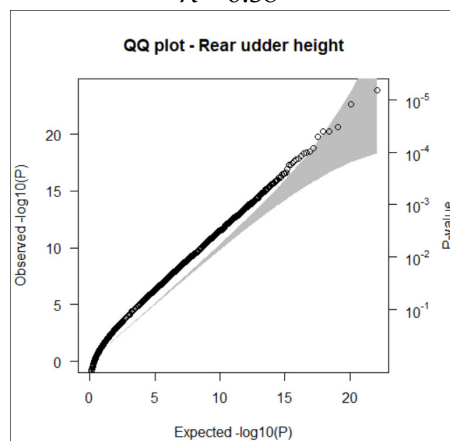

$\lambda = 0.81$

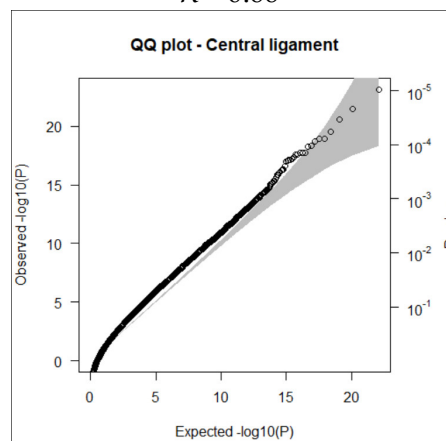

$\lambda = 0.05$

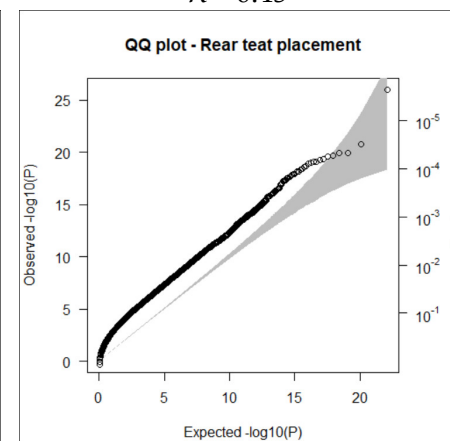

$\lambda = 3.05$

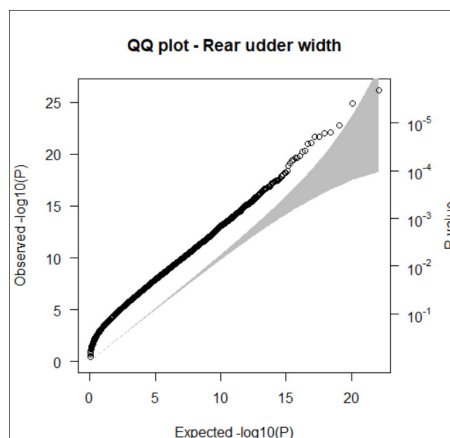

$\lambda = 4.10$

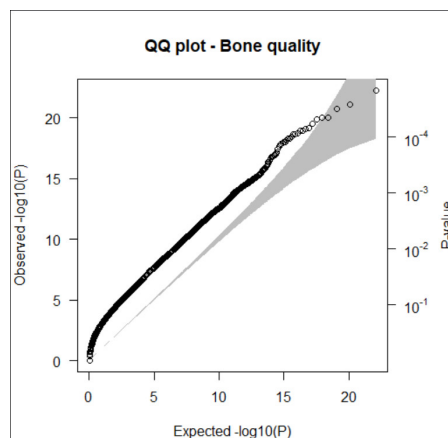

$\lambda = 3.64$

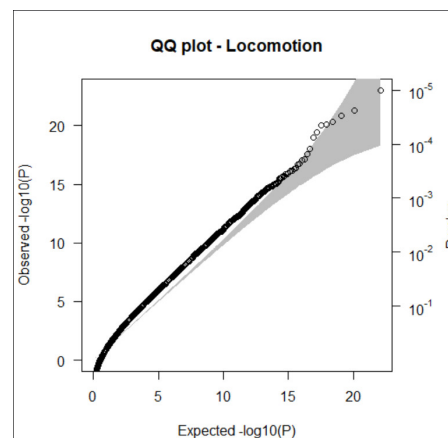

$\lambda = 0.01$

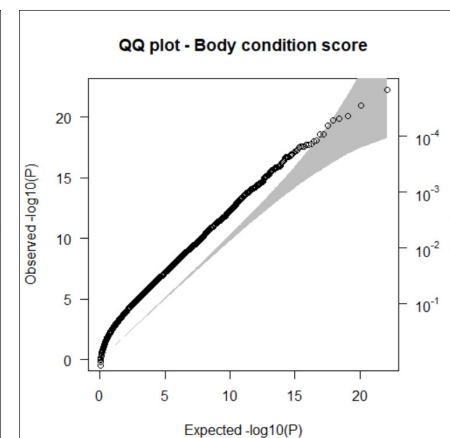

$\lambda = 2.80$

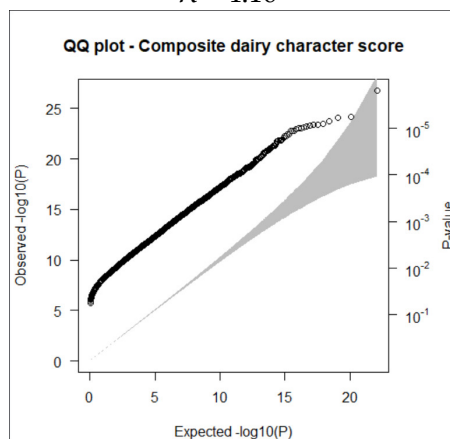

$\lambda = 12.08$

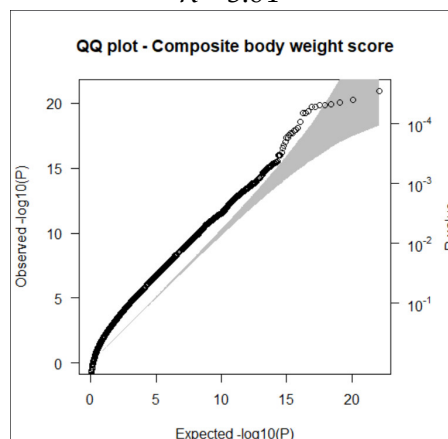

$\lambda = 1.75$

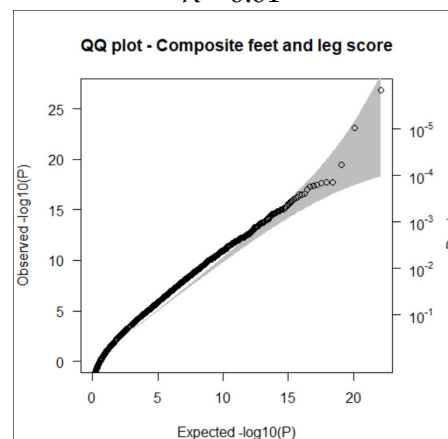

$\lambda = -0.18$

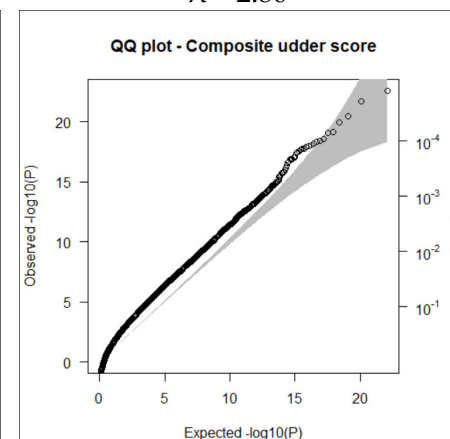

$\lambda = 0.95$

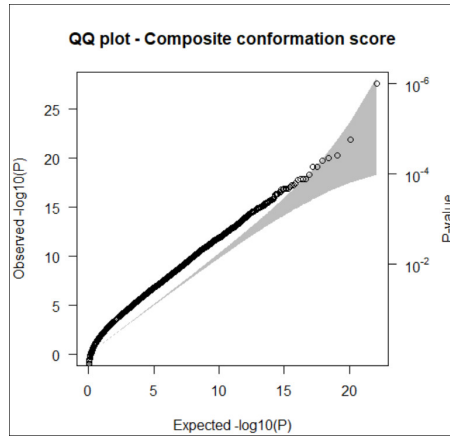

$$\lambda = 1.80$$

**Figure S1.** Quantile-quantile (Q-Q) plots with the 95% confidence interval (grey colored area) and genomic inflation factor (below the QQ plots) of the GWAS analysis for 25 linear type traits in Czech Holstein.

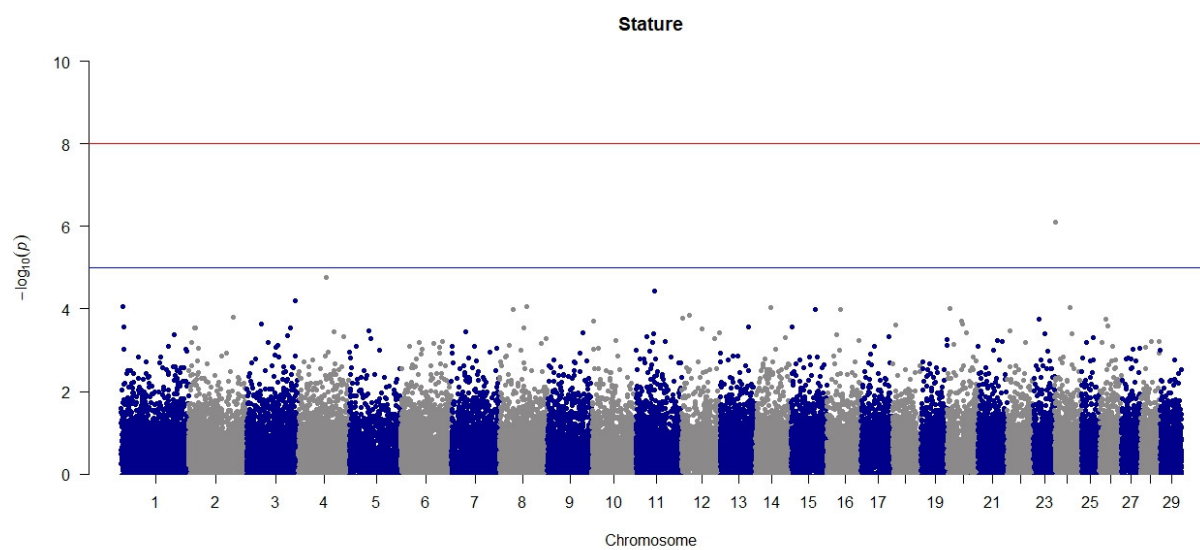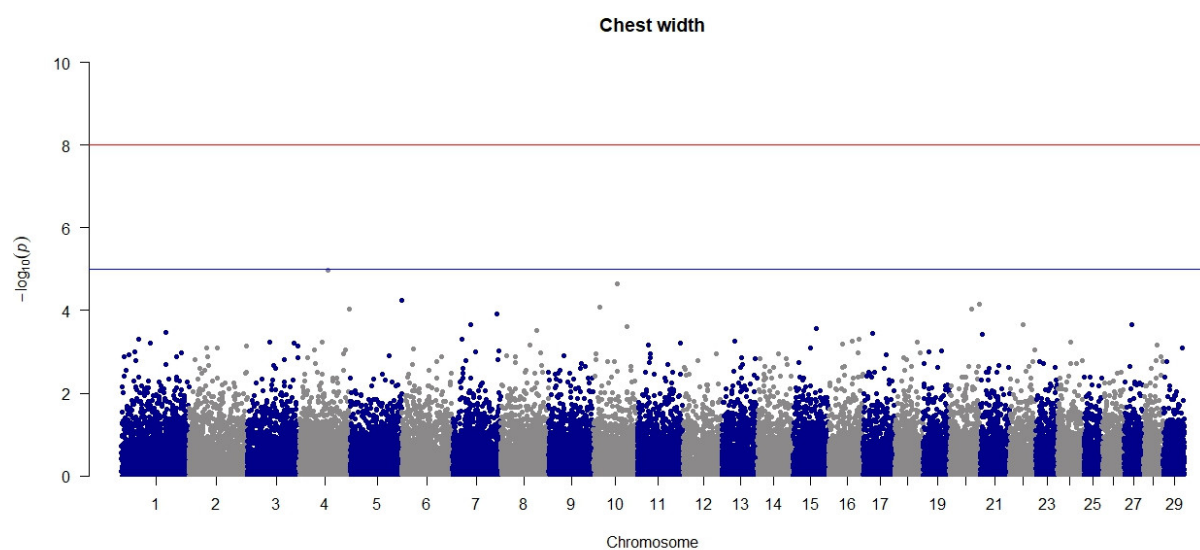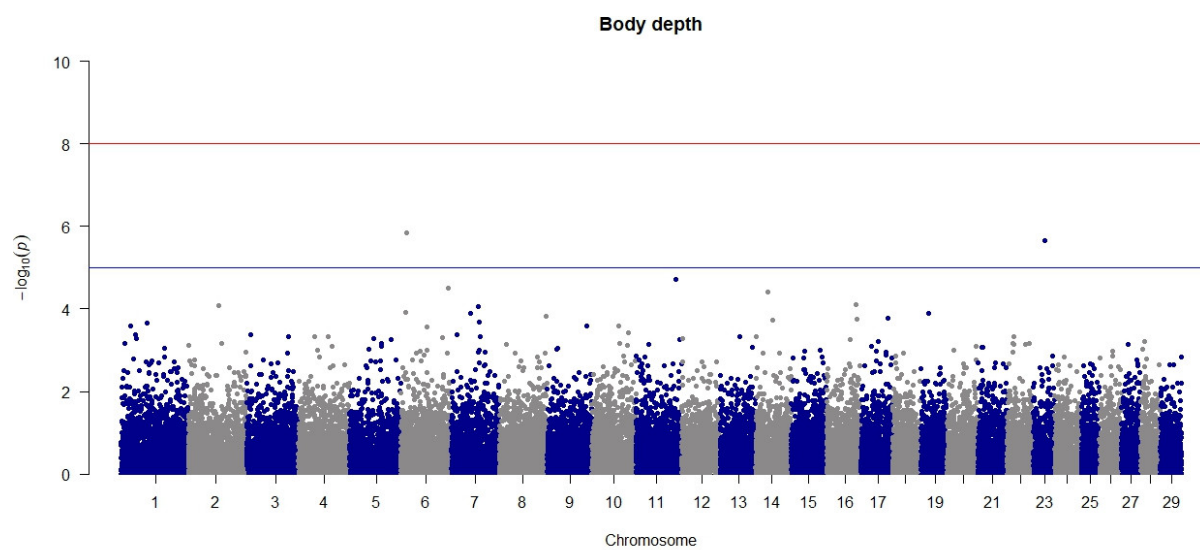

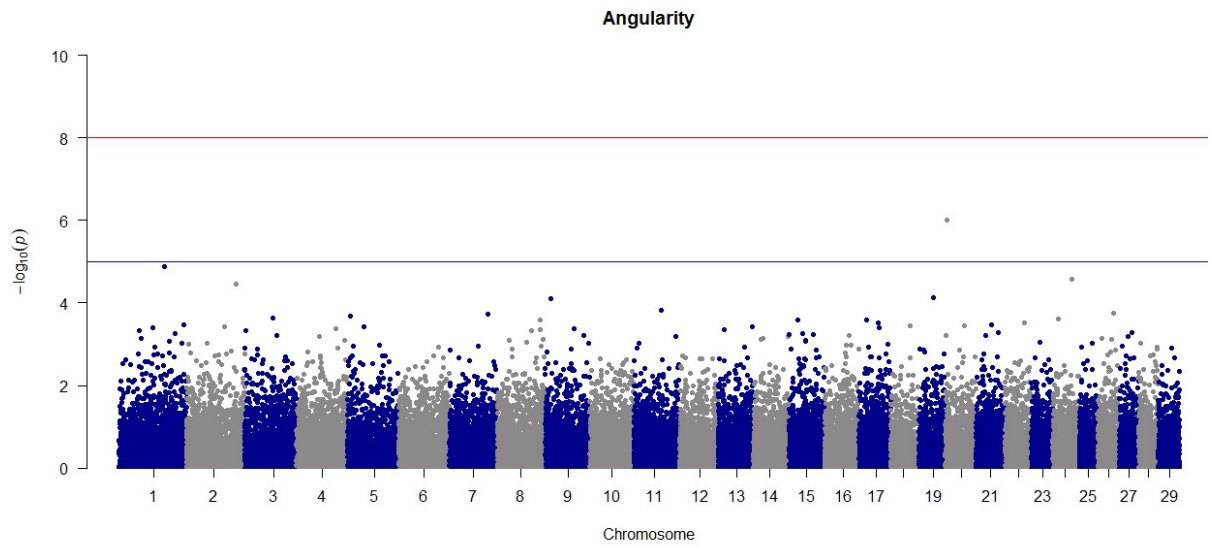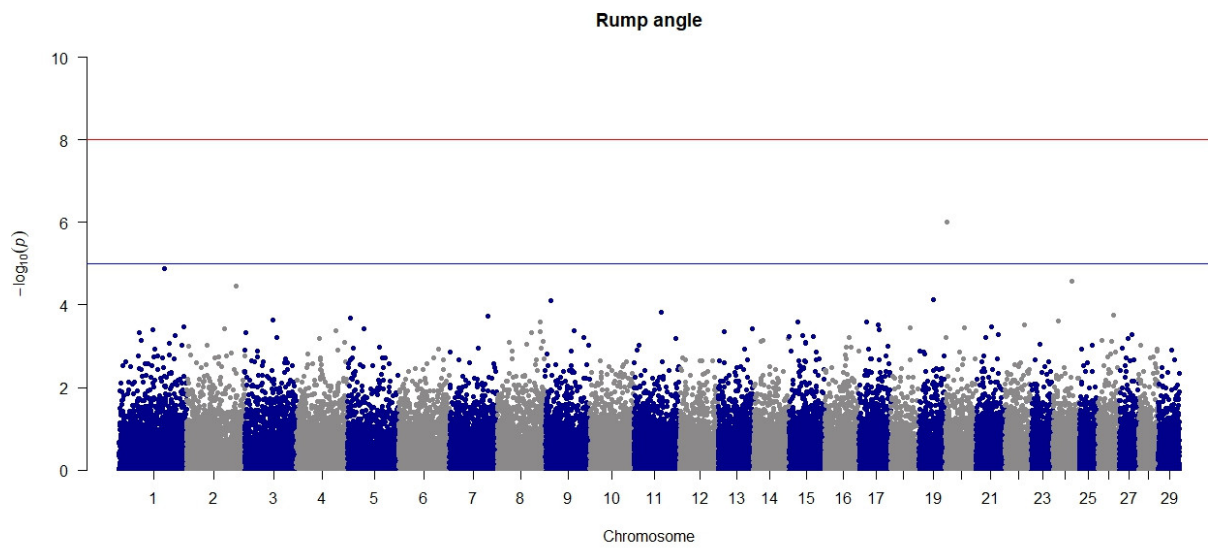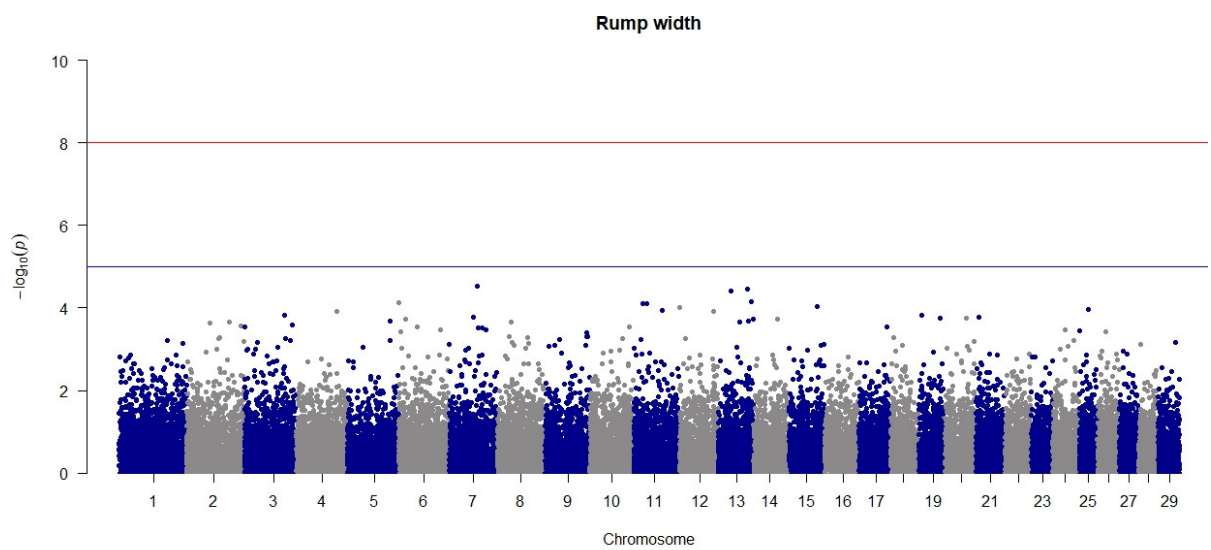

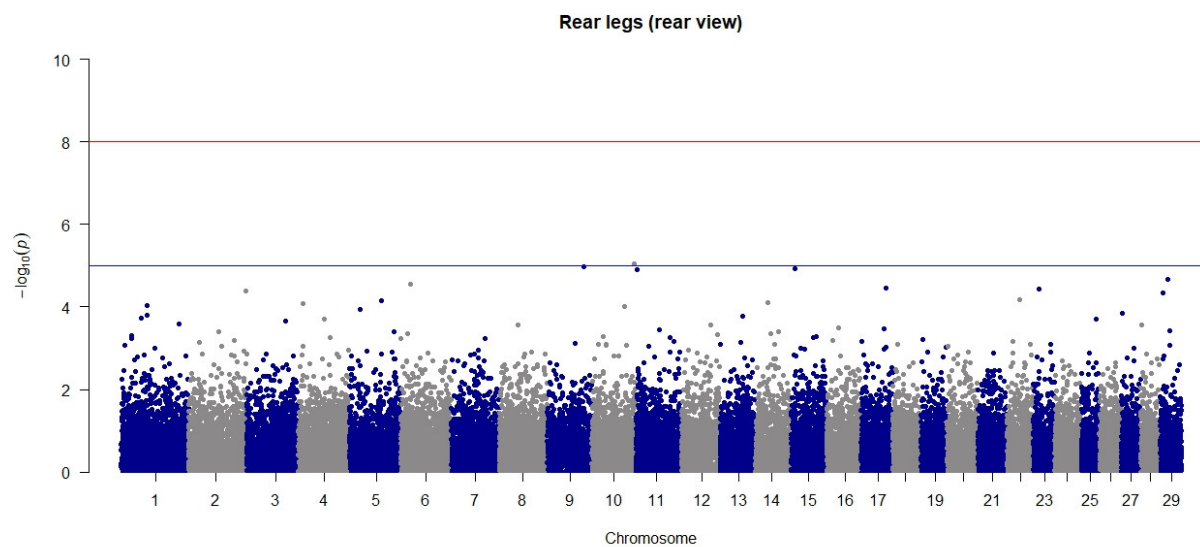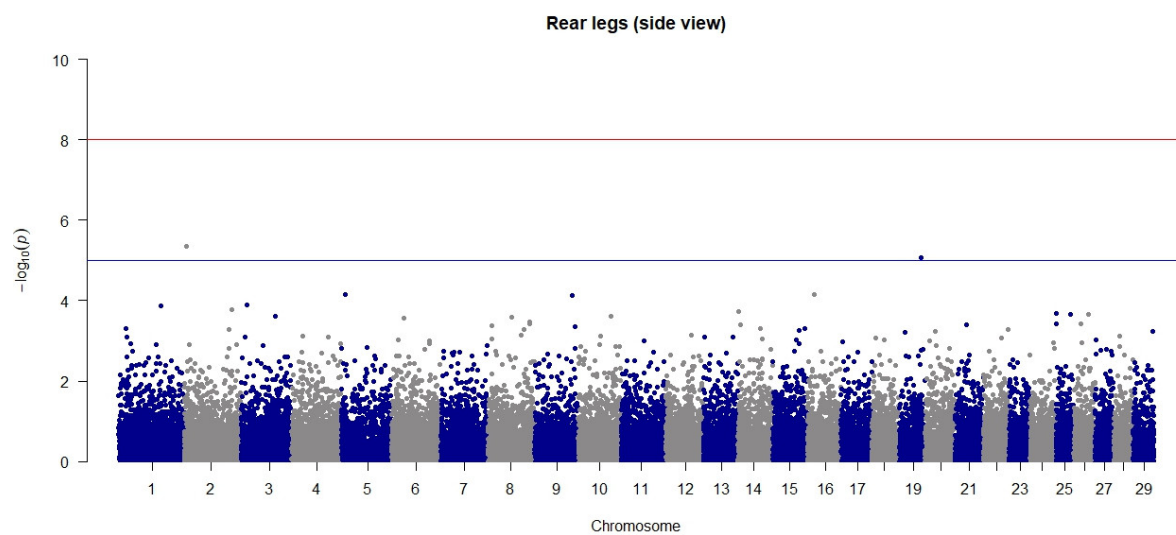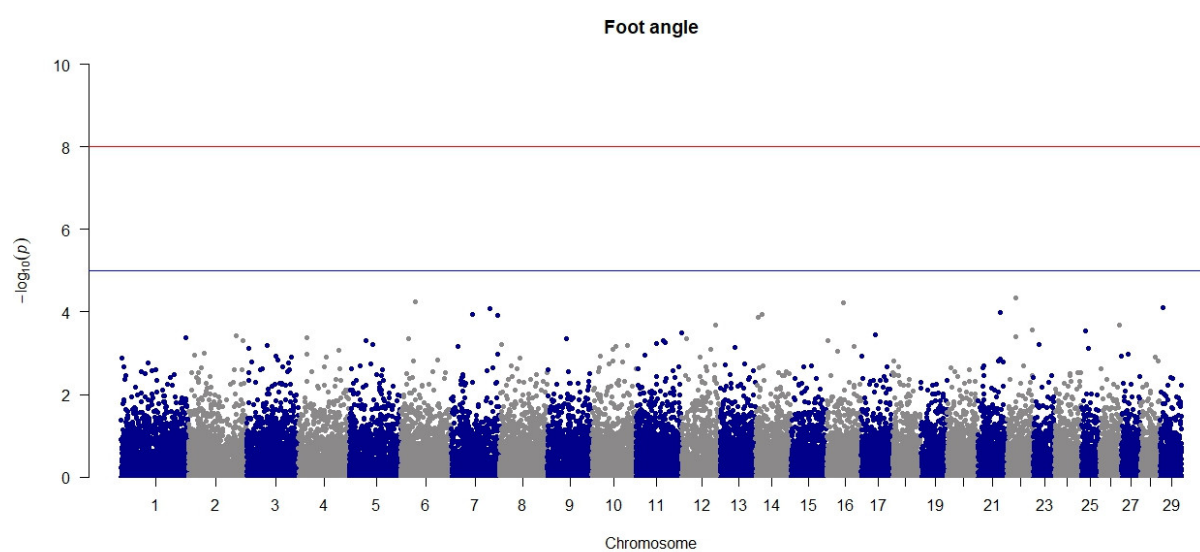



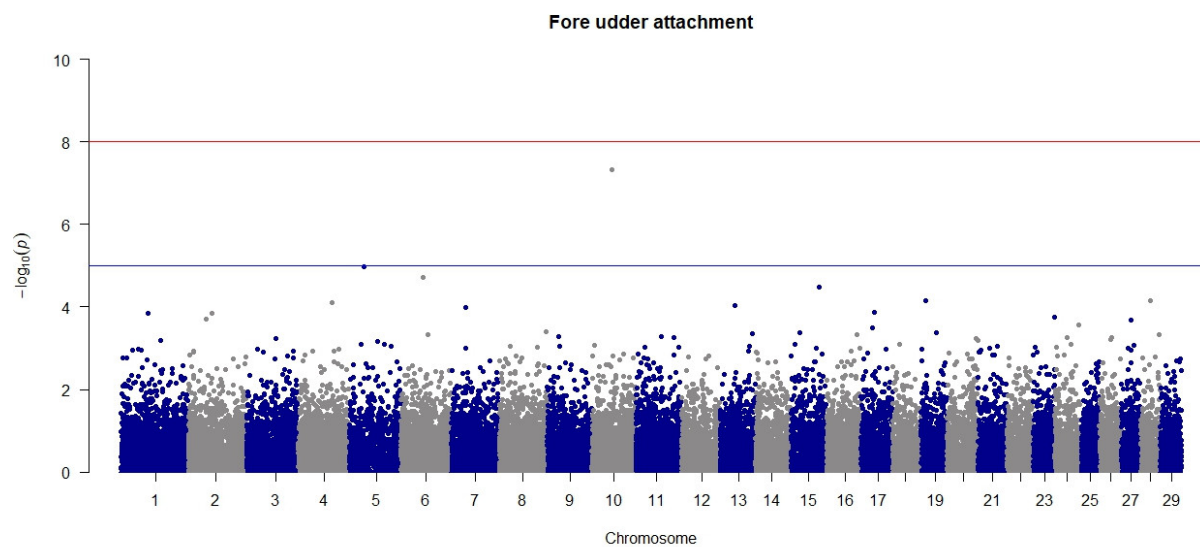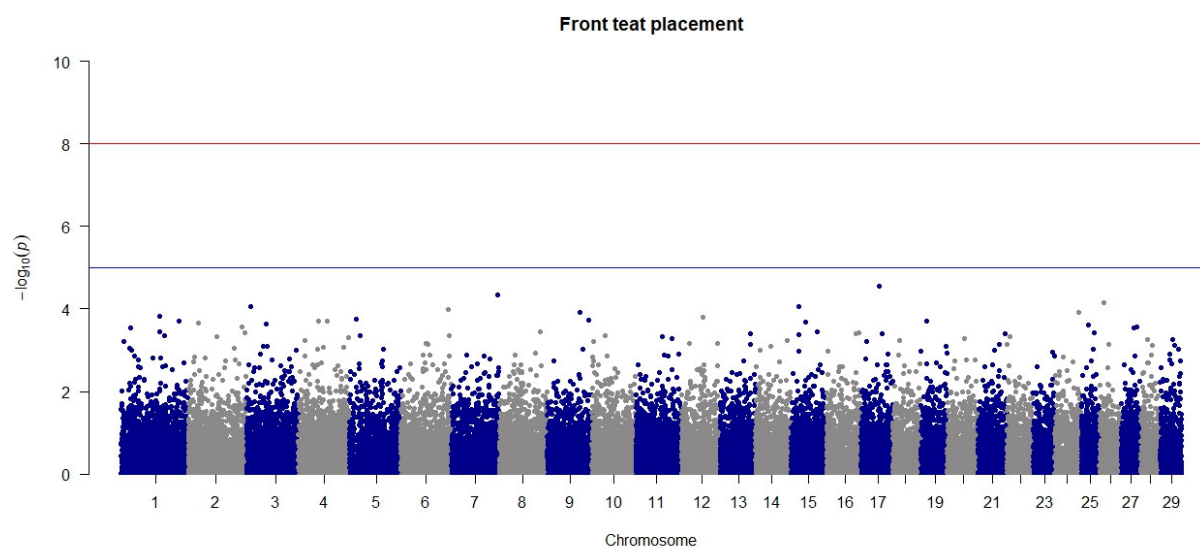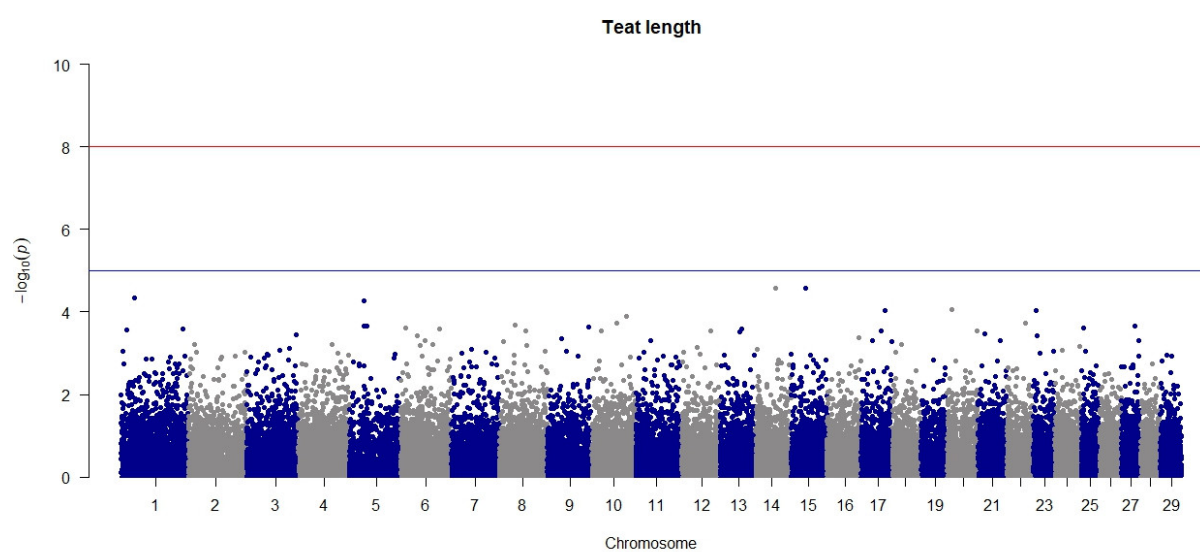



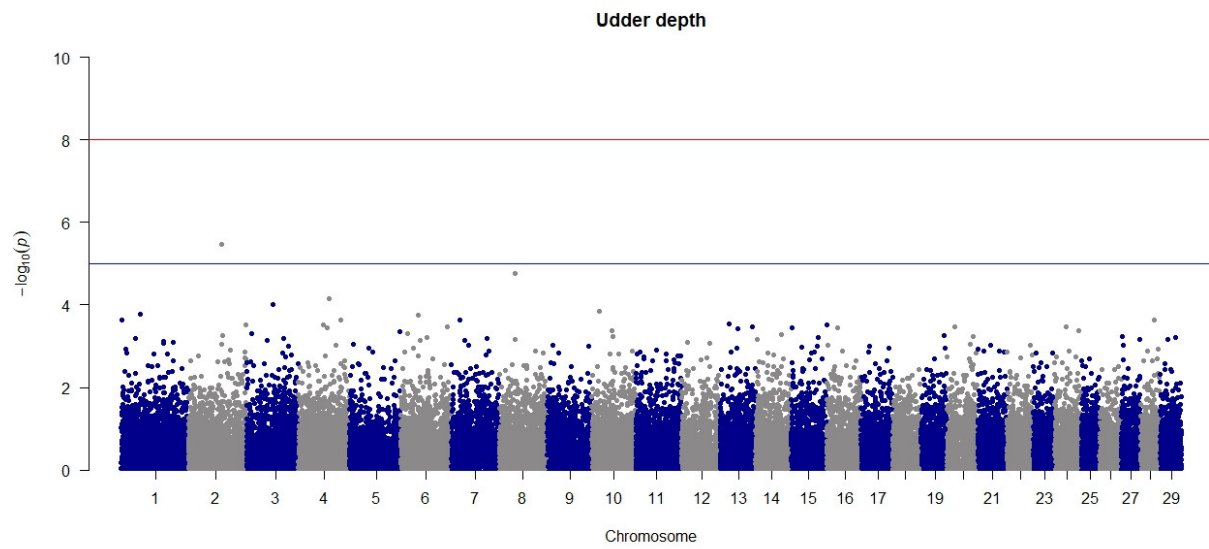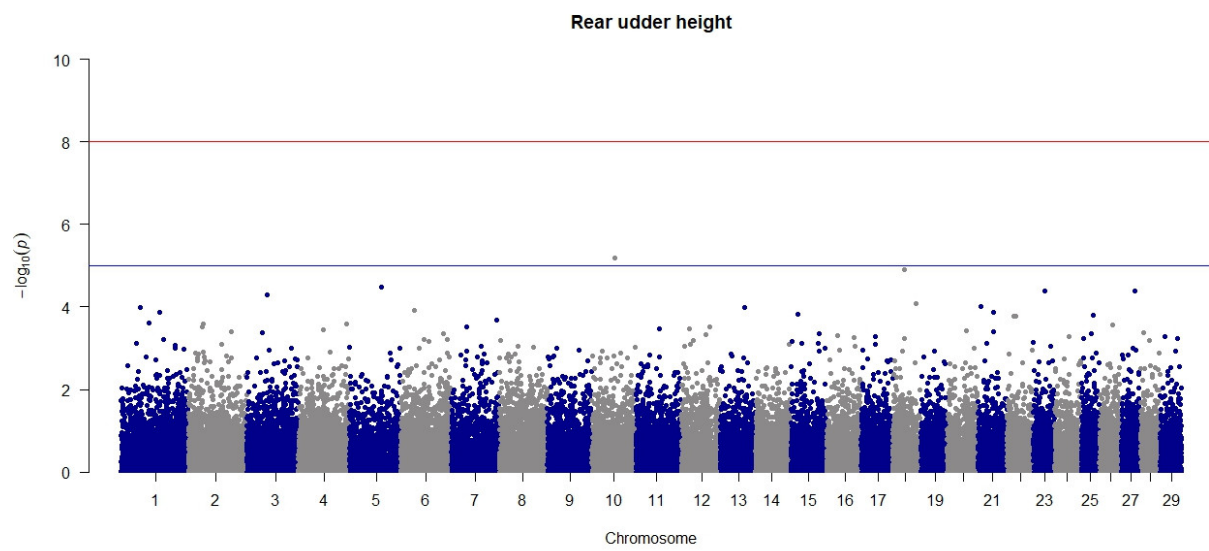

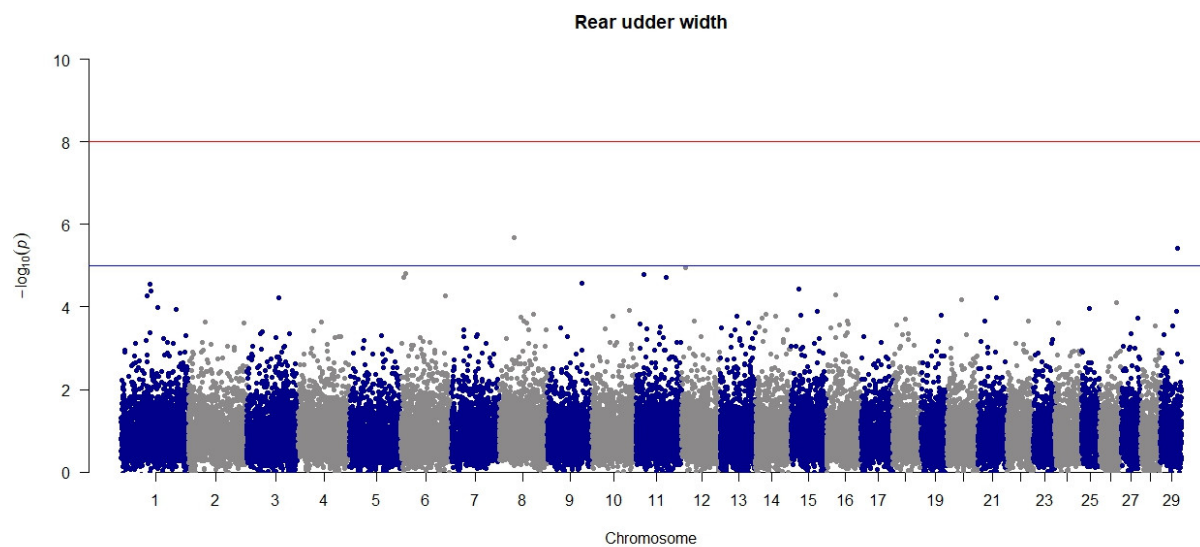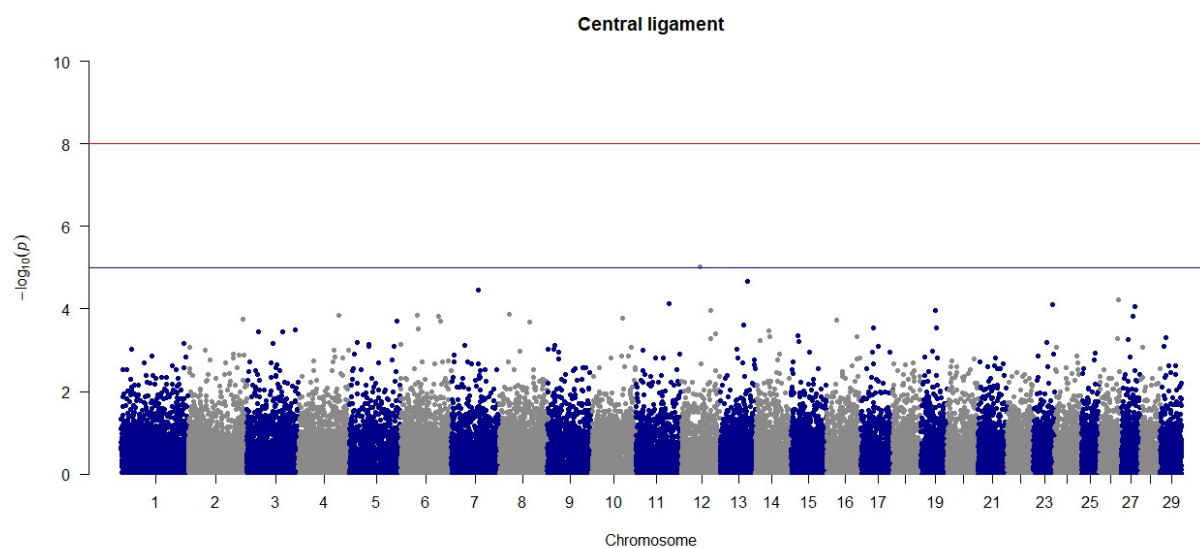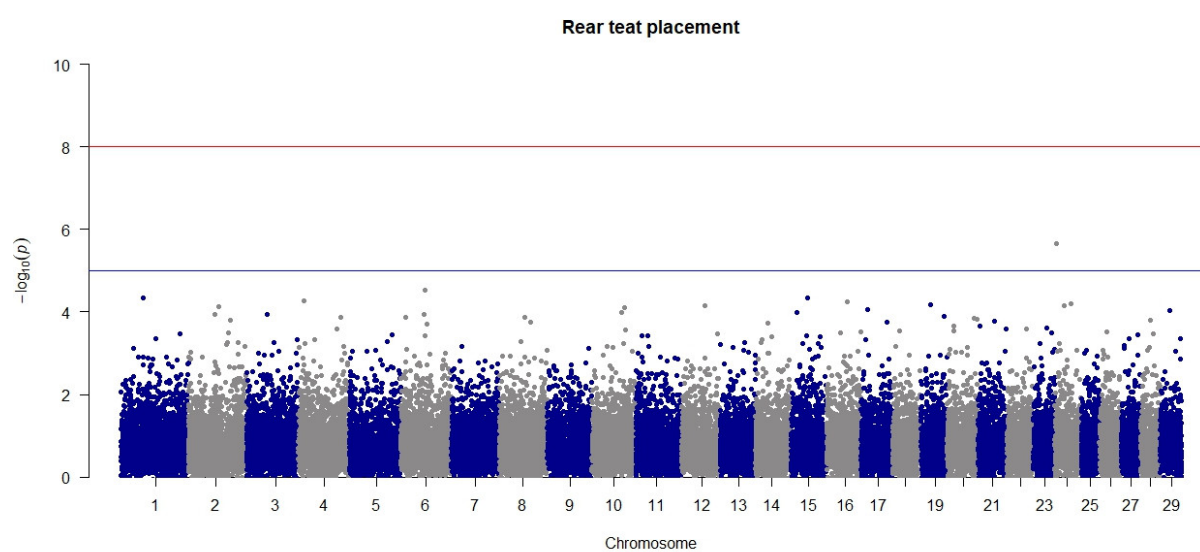

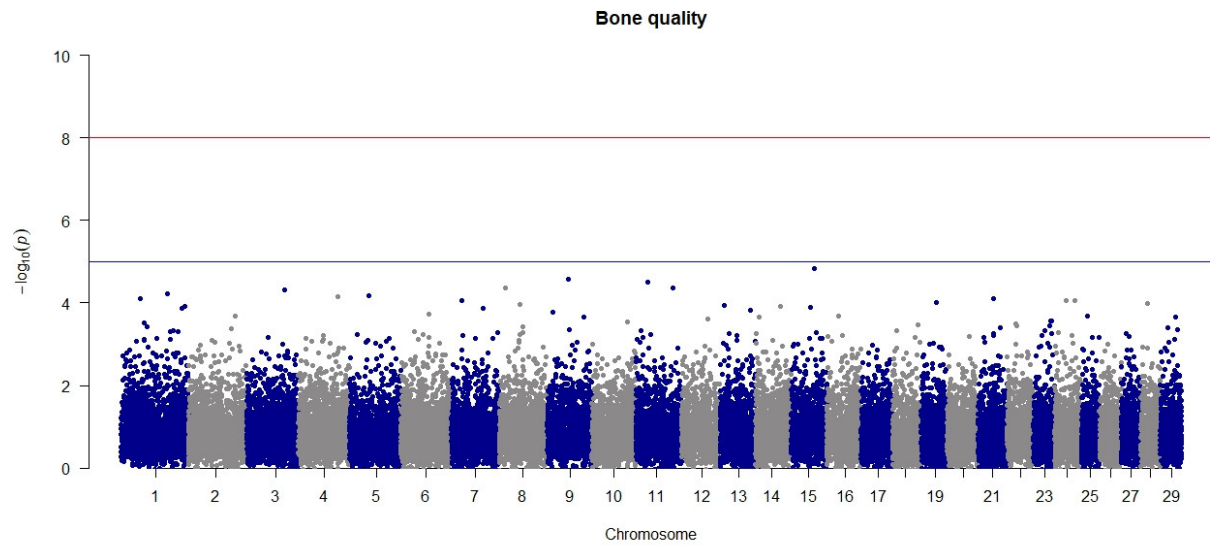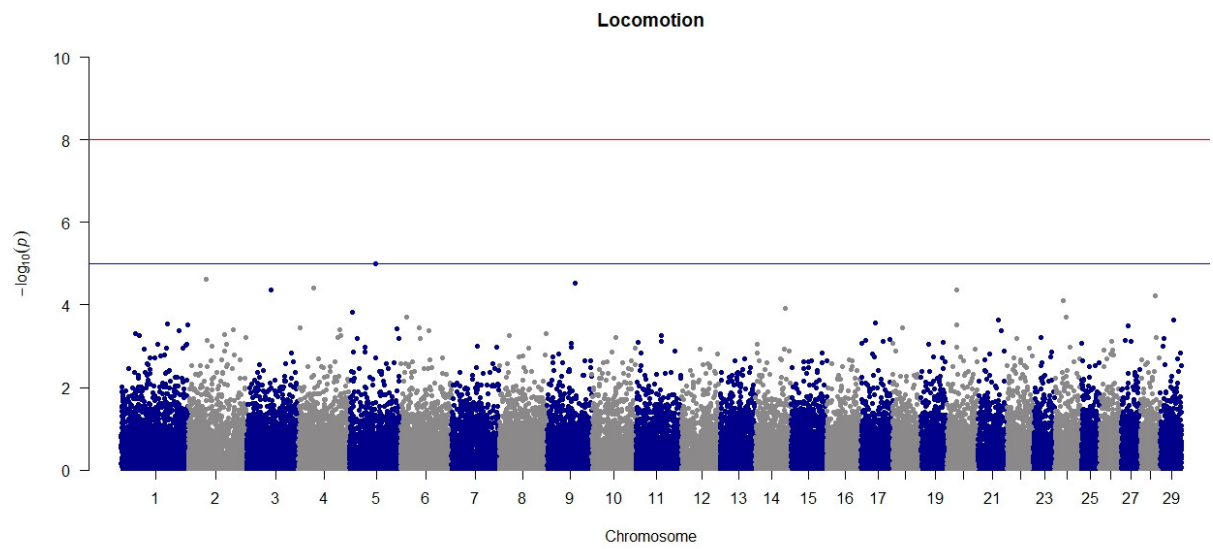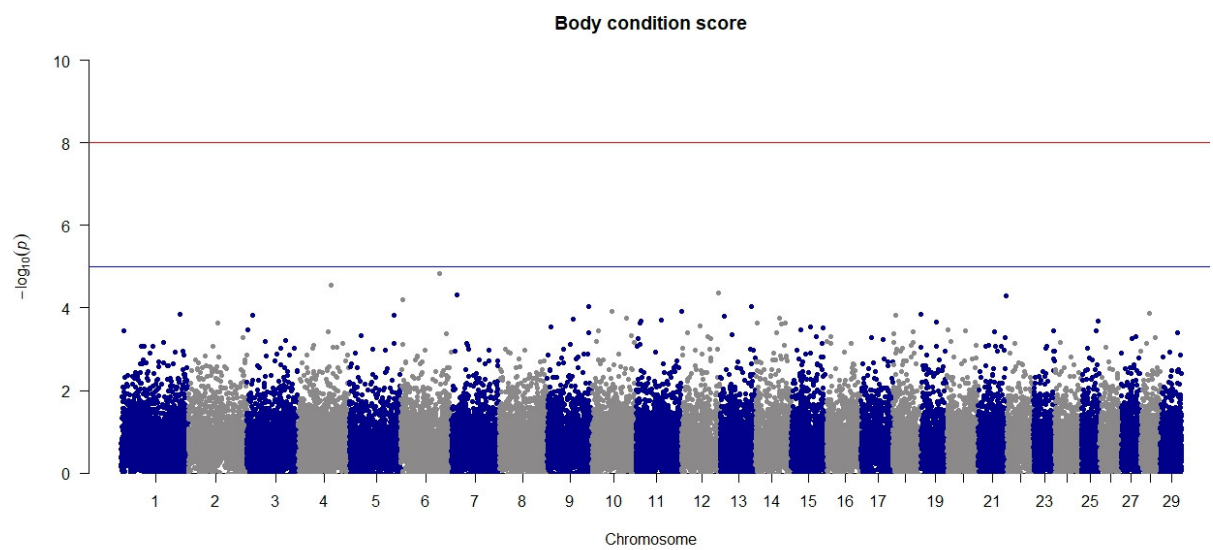

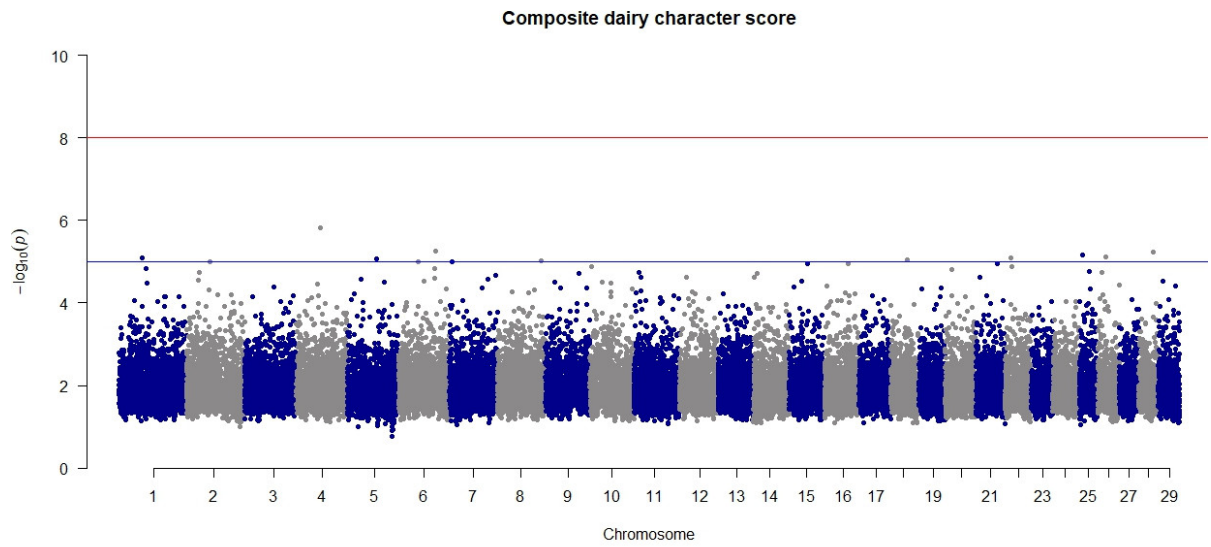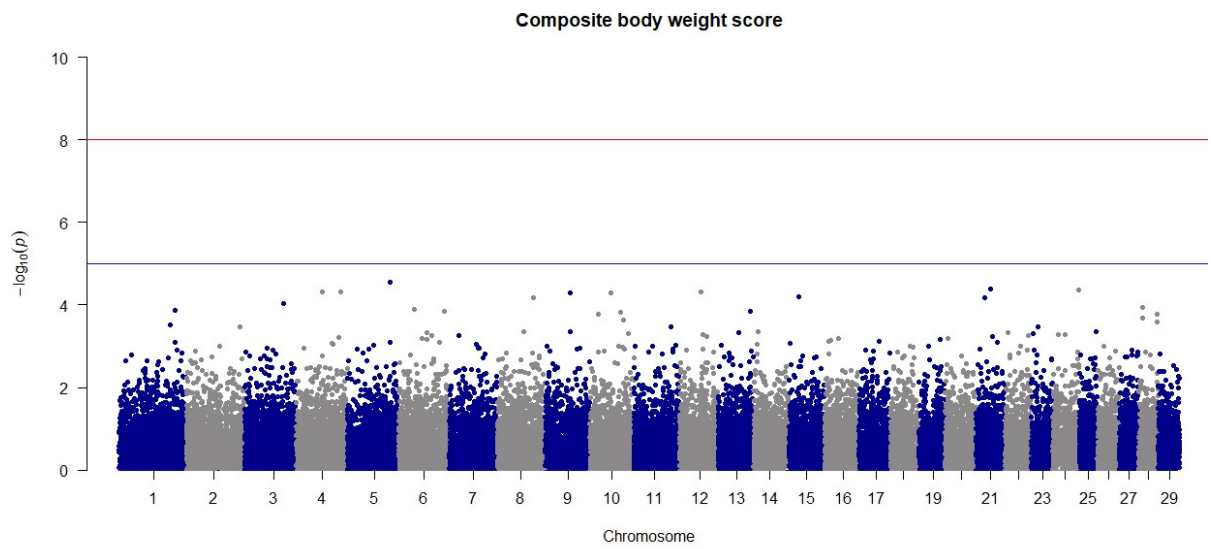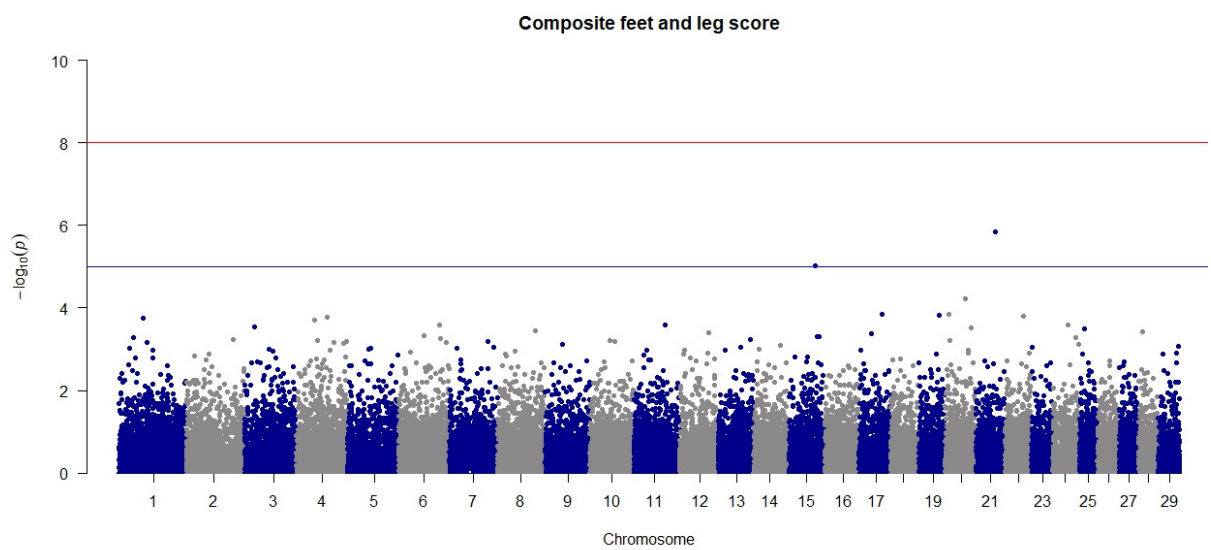

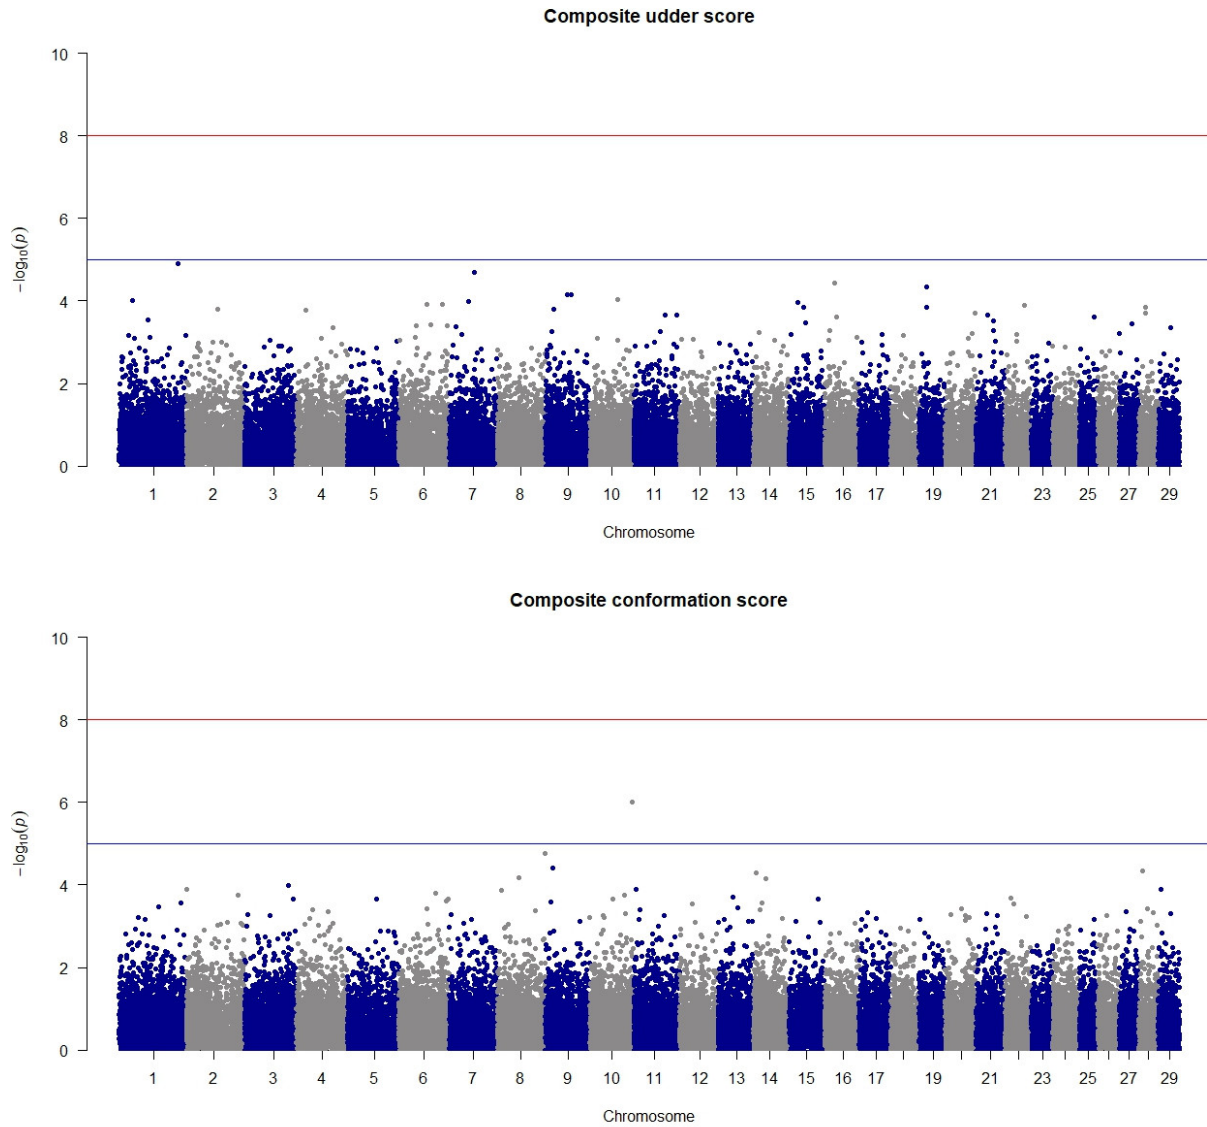

**Figure S2.** Manhattan plots of the GWAS analysis for 25 linear type traits in Czech Holstein. The level of significance was expressed by a p-value of  $1.00 \times 10^{-8}$  (genome-wide significance threshold, red line) and  $1.00 \times 10^{-5}$  (suggestive significance threshold, blue line).
